# Supplementary material
Source: PubMed Central journal article supplement (PMC3400716)
Supplement: NIHMS365360-supplement-supplement_1.pdf [file NIHMS365360-supplement-supplement_1.pdf]

**Supplementary Table 1. HLA Typing of all anti-HMGR subjects**

| #  | Sex | Race | Statin? | A  | A  | B  | B  | DRB1 | DRB1 | DQA | DQA | DQB1 | DQB1 |
|----|-----|------|---------|----|----|----|----|------|------|-----|-----|------|------|
| 1  | F   | W    | No      | 2  |    | 44 | 60 | 14   | 17   | 1   | 5   | 2    | 5    |
| 2  | M   | W    | No      | 2  | 3  | 13 | 35 | 7    | 11   | 2   | 5   | 2    | 7    |
| 3  | M   | W    | Yes     | 24 | 32 | 44 | 60 | 4    | 11   | 3   | 5   | 7    | 8    |
| 4  | F   | W    | Yes     | 3  | 29 | 44 | 60 | 4    | 7    | 2   | 3   | 2    | 7    |
| 5  | F   | W    | Yes     | 1  | 2  | 48 | 63 | 4    | 13   | 1   | 3   | 5    | 8    |
| 6  | M   | W    | Yes     | 2  | 31 | 51 | 60 | 4    | 11   | 3   | 5   | 7    | 8    |
| 7  | F   | W    | Yes     | 24 |    | 35 | 50 | 7    | 11   | 2   | 5   | 2    | 7    |
| 8  | M   | W    | Yes     | 3  | 11 | 35 | 62 | 4    | 11   | 3   | 5   | 7    |      |
| 9  | F   | W    | Yes     | 3  | 68 | 35 | 65 | 11   | 13   | 5   |     | 7    |      |
| 10 | M   | W    | Yes     | 2  | 11 | 44 | 62 | 4    | 8    | 3   | 4   | 4    | 8    |
| 11 | M   | W    | Yes     | 2  | 23 | 44 | 61 | 11   | 14   | 1   | 5   | 5    | 7    |
| 12 | F   | W    | Yes     | 2  | 29 | 44 |    | 7    | 11   | 2   | 5   | 2    | 7    |
| 13 | M   | W    | Yes     | 30 |    | 44 | 51 | 4    | 7    | 2   | 3   | 2    | 8    |
| 14 | M   | W    | Yes     | 1  | 3  | 57 | 62 | 7    | 11   | 2   | 5   | 7    | 9    |
| 15 | F   | W    | Yes     | 2  | 3  | 7  | 51 | 8    | 11   | 5   | 6   | 7    |      |
| 16 | F   | W    | Yes     | 2  |    | 35 | 72 | 1    | 11   | 1   | 5   | 5    | 7    |
| 17 | F   | W    | Yes     | 2  | 3  | 44 | 60 | 4    | 11   | 3   | 5   | 7    |      |
| 18 | M   | W    | Yes     | 11 | 24 | 18 | 35 | 11   | 16   | 1   | 5   | 5    | 7    |
| 19 | M   | W    | Yes     | 24 | 29 | 44 | 51 | 7    | 11   | 2   | 5   | 2    | 7    |
| 20 | F   | W    | Yes     | 1  |    | 8  | 27 | 8    | 9    | 3   | 4   | 4    | 9    |
| 21 | F   | B    | No      | 2  | 36 | 53 | 63 | 11   | 17   | 1   | 5   | 2    | 6    |
| 22 | F   | B    | No      | 23 | 36 | 8  | 53 | 7    | 11   | 1   | 2   | 2    | 6    |
| 23 | F   | B    | No      | 3  | 68 | 42 | 71 | 11   | 13   | 1   | 2   | 2    | 5    |
| 24 | M   | B    | Yes     | 24 | 68 | 7  | 72 | 11   | 15   | 1   | 5   | 6    | 7    |
| 25 | F   | B    | Yes     | 30 | 74 | 7  | 72 | 7    | 13   | 1   | 3   | 2    | 6    |
| 26 | M   | B    | Yes     | 2  | 3  | 44 | 58 | 11   | 13   | 3   | 5   | 7    | 9    |
| 27 | F   | B    | Yes     | 23 | 30 | 35 | 49 | 11   | 13   | 1   |     | 6    |      |
| 28 | F   | B    | Yes     | 74 |    | 53 | 72 | 11   | 13   | 1   |     | 5    | 6    |

M=male; F=female; W=white; B=black

**Supplementary Table 2. Characteristics of statin-intolerant subjects, n = 51\***

|                    |             |
|--------------------|-------------|
| Gender (M/F)       | 29/22       |
| Age in years (SD)  | 56.5 (10.2) |
| CK in IU/L (SD)    | 131 (71)    |
| Muscular weakness  |             |
| Low (%)            | 8 (16)      |
| Moderate (%)       | 9 (18)      |
| Myalgias           |             |
| Low (%)            | 6 (12)      |
| Moderate (%)       | 19 (37)     |
| Severe (%)         | 6 (12)      |
| CK > 300 IU/L (%)  | 3 (6)       |
| Myoglobinuria (%)  | 6 (12)      |
| Rhabdomyolysis (%) | 1 (2)       |

\*As previously published in Mammen, et al., *Arthritis Care Res* (Hoboken). 2011 Oct 3. doi: 10.1002/acr.20662. [Epub ahead of print]
